# Supplementary material for: Enhanced sodium storage via the hetero-interface effect in BiOCl/TiO2 p–n junctions
Source: Royal Society of Chemistry journal article supplement (doi:10.1039/c9cc00843h), 2019-01-01
Supplement: c9cc00843h1.pdf [file c9cc00843h1.pdf]

Supporting Information

**Enhanced sodium storage by hetero-interface effect in  
BiOCl/TiO<sub>2</sub> p-n junctions**

**Wei Song, Hanqing Zhao\*, Hanting Shen, Jianqi Ye, Dan Zhao, Zhong Li\***

Key Laboratory of Coal Science and Technology of Ministry of Education and Shanxi  
Province, Taiyuan University of Technology, Taiyuan 030024, China

Corresponding Authors

\*E-mail: [zhaohanqing@tyut.edu.cn](mailto:zhaohanqing@tyut.edu.cn)

\*E-mail: [lizhong@tyut.edu.cn](mailto:lizhong@tyut.edu.cn)

## Experiment

A series of BiOCl/TiO<sub>2</sub> p-n junctions with different mass ratio were synthesized via a facile sol-gel method and followed by heat treatment. Certain amount of BiCl<sub>3</sub> was dissolved into 25 mL glycol to form a uniform yellowish solution. 2.5 g titanium butoxide was added dropwise to the solution under magnetic stirring. After that, the gel was dried at 180 °C to remove the solvent and then calcined at 500 °C for 2 h in air. The product was washed by water and ethanol for several times and dried at 60 °C. Pure-phased TiO<sub>2</sub> and BiOCl were also synthesized for comparison according to similar procedure. BiOCl/TiO<sub>2</sub> p-n junctions are named as 7%-BiOCl/TiO<sub>2</sub>, 14%-BiOCl/TiO<sub>2</sub> and 28%-BiOCl/TiO<sub>2</sub> based on mass ratio of BiCl<sub>3</sub> (0.175 g, 0.35 g, 0.7 g) and titanium butoxide (2.5 g).

X-ray diffraction (XRD) was measured using Rigaku MiniFlex600. Transmission electron microscopy (TEM) was performed on JEOL JEM2100F. X-ray absorption spectroscopy (XAS) was carried out in Photoelectron Spectroscopy Station (4B9B, Beijing Synchrotron Radiation Facility). Ultraviolet-visible spectroscopy (UV-Vis) was obtained utilizing U-3900 (Hitachi). X-ray photoelectron spectroscopy (XPS) was recorded by Escalab 250Xi (Thermo Fisher Scientific). N<sub>2</sub> adsorption-desorption isotherms were conducted by BeiShiDe (3H-2000 PS2).

The electrodes were prepared in a conventional way by mixing the active materials with Super P and a sodium alginate binder and then tested in coin cell. The electrolyte was consisted of 1 M NaClO<sub>4</sub> in ethylene carbonate (EC) and propylene carbonate (PC) with a volume ratio of 1:1 and 5% fluorinated ethylene carbonate (FEC) as an

electrolyte additive. The discharge-charge measurements were collected on a battery tester (Land CT2001A, China) in the voltage range between 0.01 V and 3 V. The CV curves of the TiO<sub>2</sub>, 14%-BiOCl/TiO<sub>2</sub> and BiOCl electrodes were recorded between 0.01 V and 3 V at different scan rates from 0.1 mV s<sup>-1</sup> to 1.0 mV s<sup>-1</sup> on CHI1000C electrochemical workstation. Electrochemical impedance spectra (EIS) were analyzed on an electrochemical workstation (CHI660E, China), collecting by 5.0 mV amplitude over the range from 10<sup>-1</sup> Hz to 10<sup>5</sup> Hz.

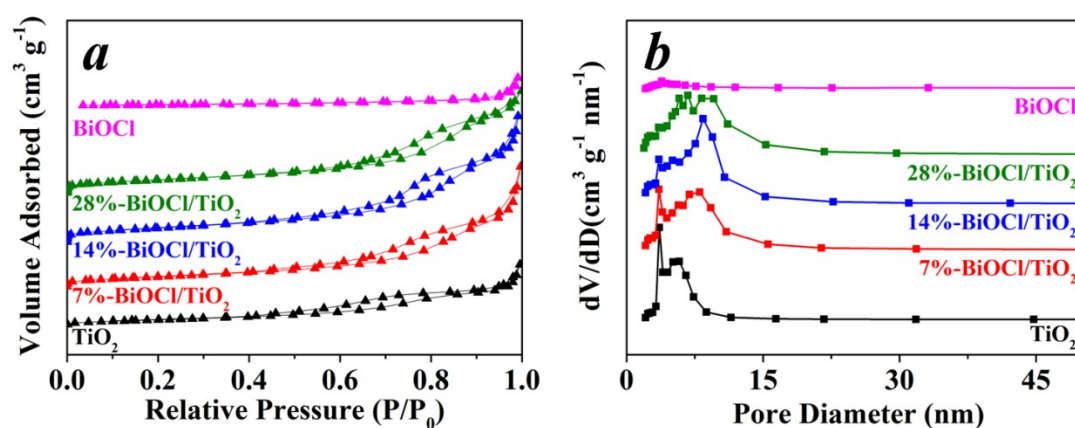

Fig. S1 (a) N<sub>2</sub> adsorption-desorption isotherms and (b) pore size distribution of BiOCl/TiO<sub>2</sub> p-n junctions, pure TiO<sub>2</sub> and pure BiOCl

| samples                    | BET surface area (m <sup>2</sup> g <sup>-1</sup> ) | pore volume (ml g <sup>-1</sup> ) | average pore diameter (nm) |
|----------------------------|----------------------------------------------------|-----------------------------------|----------------------------|
| TiO <sub>2</sub>           | 30.0219                                            | 0.1165                            | 8.15                       |
| 7%-BiOCl/TiO <sub>2</sub>  | 48.3393                                            | 0.2158                            | 11.24                      |
| 14%-BiOCl/TiO <sub>2</sub> | 59.7670                                            | 0.2256                            | 10.06                      |
| 28%-BiOCl/TiO <sub>2</sub> | 53.7416                                            | 0.1813                            | 9.09                       |
| BiOCl                      | 4.1618                                             | 0.0479                            | 20.25                      |

Table.1 BET surface area, pore volume and average pore diameter of BiOCl/TiO<sub>2</sub> p-n junctions, pure TiO<sub>2</sub> and pure BiOCl

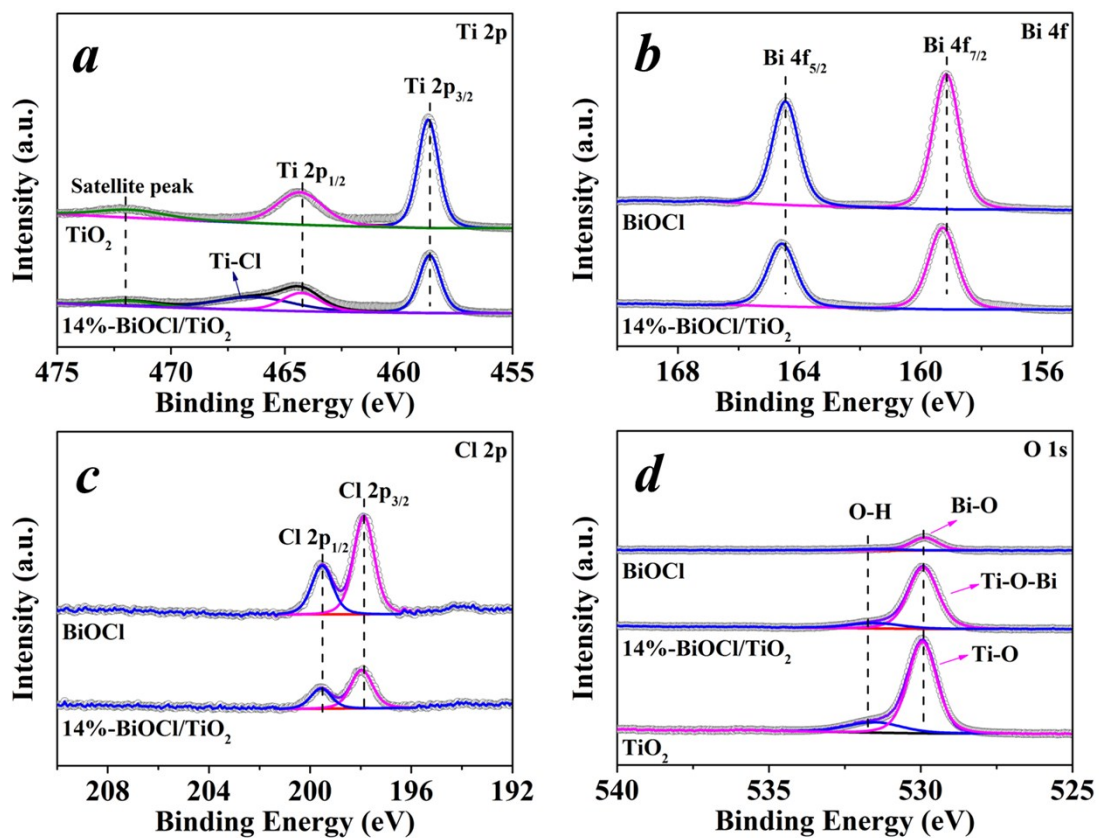

Fig. S2 XPS spectra of 14%-BiOCl/TiO<sub>2</sub>, pure TiO<sub>2</sub> and pure BiOCl

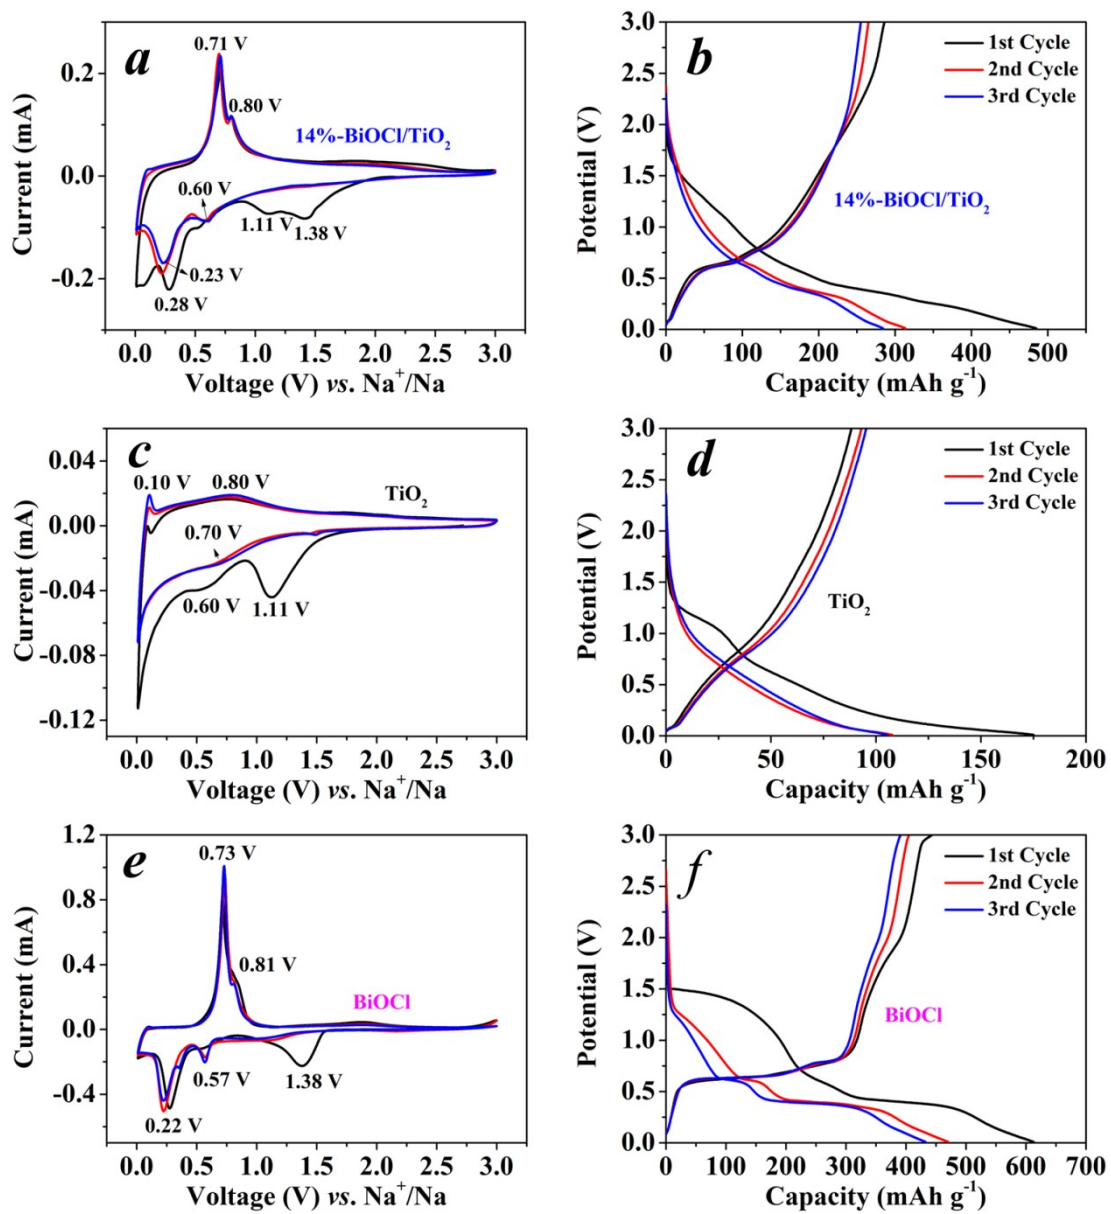

Fig. S3 CV and charge-discharge curves of 14%-BiOCl/TiO<sub>2</sub>, pure TiO<sub>2</sub> and pure BiOCl

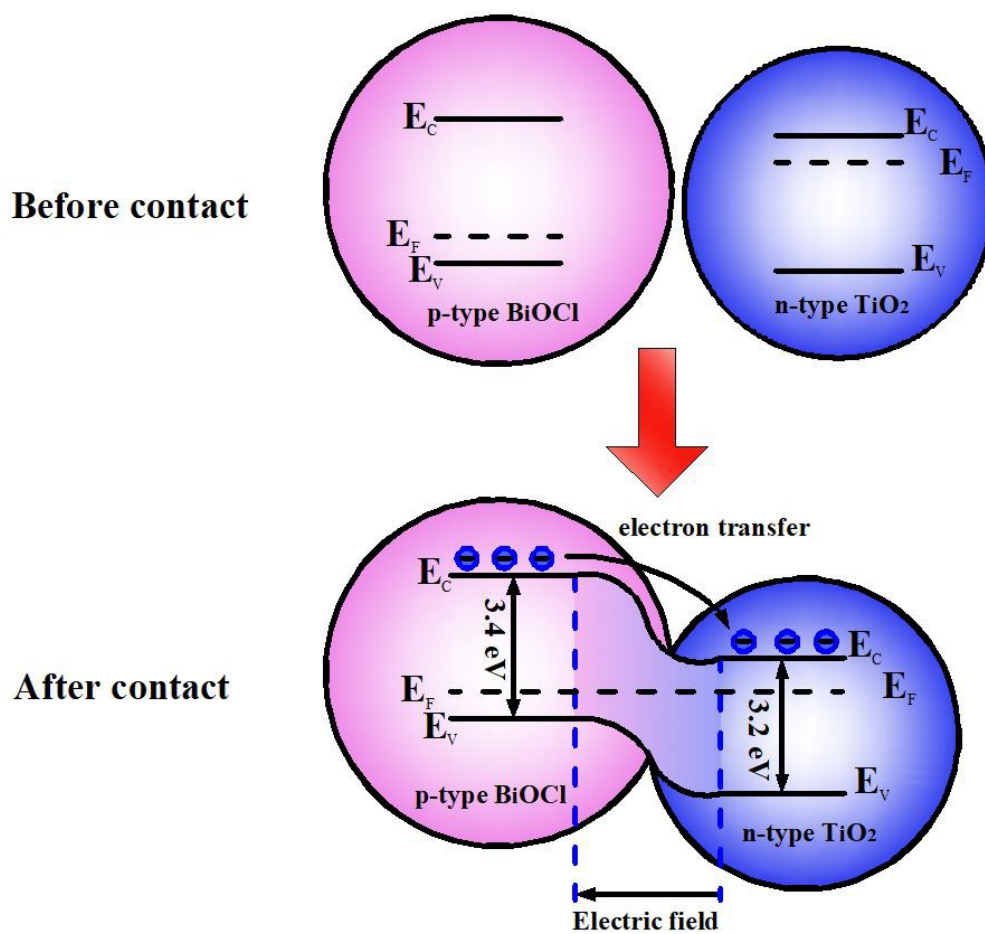

Fig. S4 the formation scheme of BiOCl/TiO<sub>2</sub> p-n junctions

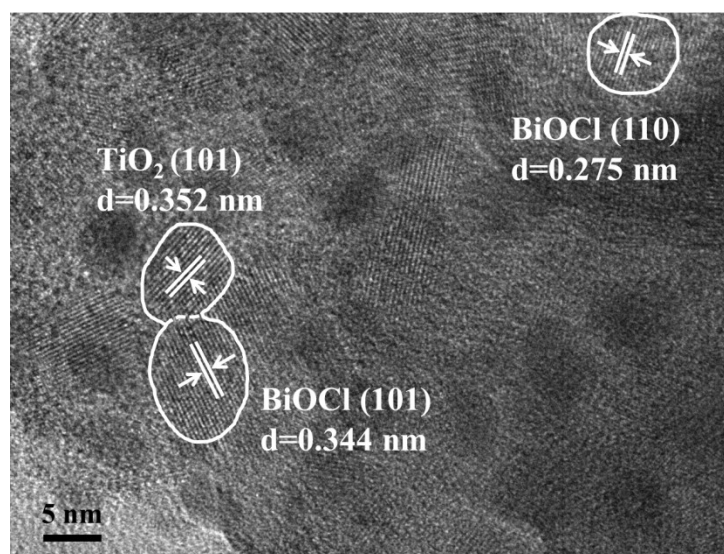

Fig. S5 HRTEM image of 14%-BiOCl/TiO<sub>2</sub> electrode after 100 cycles

| materials                                              | Rate performance                                                                                 | Reference |
|--------------------------------------------------------|--------------------------------------------------------------------------------------------------|-----------|
| 14%-BiOCl/TiO <sub>2</sub>                             | 154 mAh g <sup>-1</sup> at 1 A g <sup>-1</sup><br>124 mAh g <sup>-1</sup> at 2 A g <sup>-1</sup> | this work |
| Oxygen Deficient Anatase<br>TiO <sub>2</sub>           | 124.6 mAh g <sup>-1</sup> at 1 A g <sup>-1</sup>                                                 | 1         |
| Niobium-doped anatase<br>TiO <sub>2</sub>              | 108.8 mAh g <sup>-1</sup> at 5 C<br>(1 C=330 mA g <sup>-1</sup> )                                | 2         |
| N/S co-doped TiO <sub>2</sub><br>nanoparticles         | 75 mAh g <sup>-1</sup> at 1 A g <sup>-1</sup>                                                    | 3         |
| pinecone-like carbon-<br>coupled TiO <sub>2</sub>      | 139.7 mAh g <sup>-1</sup> at 5 C<br>(1 C=336 mA g <sup>-1</sup> )                                | 4         |
| TiO <sub>2</sub> /C nanopowders                        | 93 mAh g <sup>-1</sup> at 2 A g <sup>-1</sup>                                                    | 5         |
| Anatase TiO <sub>2</sub> @C<br>composites              | 111.1 mAh g <sup>-1</sup> at 1 A g <sup>-1</sup>                                                 | 6         |
| Carbon coated anatase<br>TiO <sub>2</sub> mesocrystals | 113.3 mAh g <sup>-1</sup> at 10 C<br>(1 C=168 mA g <sup>-1</sup> )                               | 7         |
| Carbon-coated rutile<br>titanium dioxide               | 86.8 mAh g <sup>-1</sup> at 10 C<br>(1 C=168 mA g <sup>-1</sup> )                                | 8         |
| TiO <sub>2</sub> @N-doped graphene                     | 140 mAh g <sup>-1</sup> at 5 C<br>(1 C=335 mA g <sup>-1</sup> )                                  | 9         |

Table. 2 Comparison of rate performance for 14%-BiOCl/TiO<sub>2</sub> with some TiO<sub>2</sub>-based anodes modified by carbon coating and heteroatoms doping

## Reference

- 1 W. Wang, M. Wu, P. Han, Y. Liu, L. He, Q. Huang, J. Wang, W. Yan, L. Fu, and Y. Wu, *ACS Appl. Mater. Interfaces*, 2018, **11**, 3061.
- 2 F. Zhao, B. Wang, Y. Tang, H. Ge, Z. Huang and H. Liu, *J. Mater. Chem. A*, 2015, **3**, 22969.
- 3 W. Song, H. Zhao, L. Wang, S. Liu, and Z. Li, *ChemElectroChem*, 2018, **5**, 316.
- 4 J. Chen, G. Zou, H. Hou, Y. Zhang, Z. Huang and X. Ji, *J. Mater. Chem. A*, 2016, **4**, 12591.
- 5 C. Ding, T. Nohira and R. Hagiwara, *J. Mater. Chem. A.*, 2015, **3**, 20767.
- 6 X. Shi, Z. Zhang, K. Du, Y. Lai, J. Fang and J. Li, *J. Power Sources*, 2016, **330**, 2.
- 7 W. Zhang, T. Lan, T. Ding, N. Wu and M. Wei, *J. Power Sources*, 2017, **359**, 64.
- 8 G. Zou, J. Chen, Y. Zhang, C. Wang, Z. Huang, S. Li, H. Liao, J. Wang and X. Ji, *J. Power Sources*, 2016, **325**, 25.
- 9 B. Li, B. Xi, Z. Feng, Y. Lin, J. Liu, J. Feng and Y. Qian, *Adv. Mater.*, 2018, **1705788**, 1.
